# Supplementary material for: Escherichia coli Producing Extended-Spectrum β-lactamases (ESBL) from Domestic Camels in the Canary Islands: A One Health Approach
Source: MDPI journal article supplement (doi:10.3390/ani10081295), 2020-07-29
Supplement: s1 [file s1]

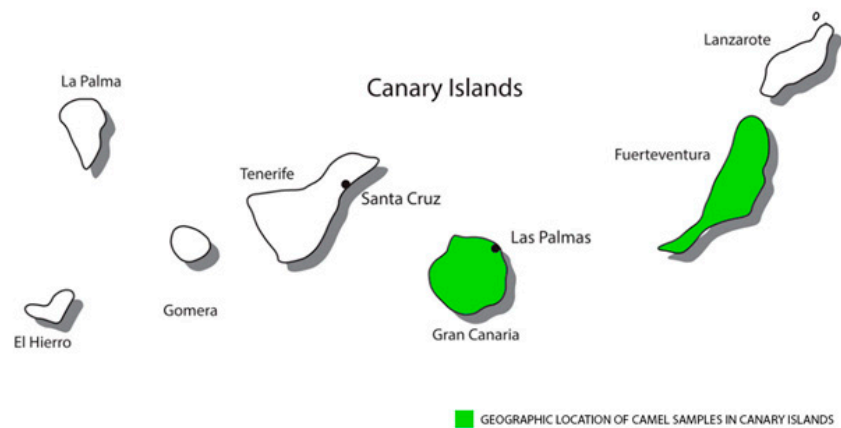

**Figure S1** – Origin of camels' samples: Fuerteventura and Gran Canaria (Canary Islands, Spain).
